# Supplementary material for: Antioxidant and anti-inflammatory effects of allicin in the kidney of an experimental model of metabolic syndrome
Source: PeerJ journal article supplement (doi:10.7717/peerj.16132), 2023-09-27
Supplement: blotspdf.pdf [file blotspdf.pdf]

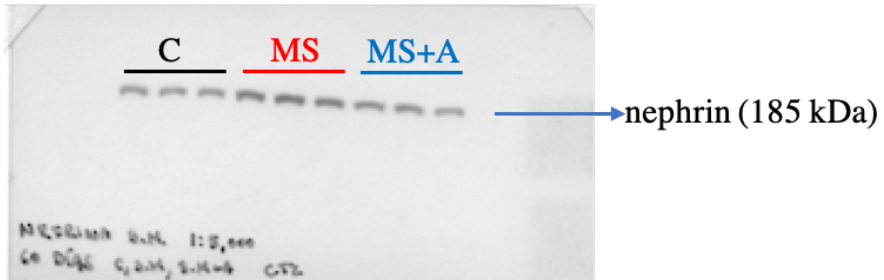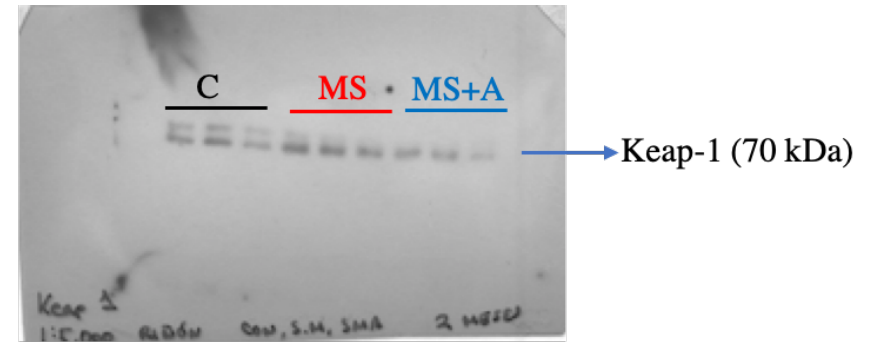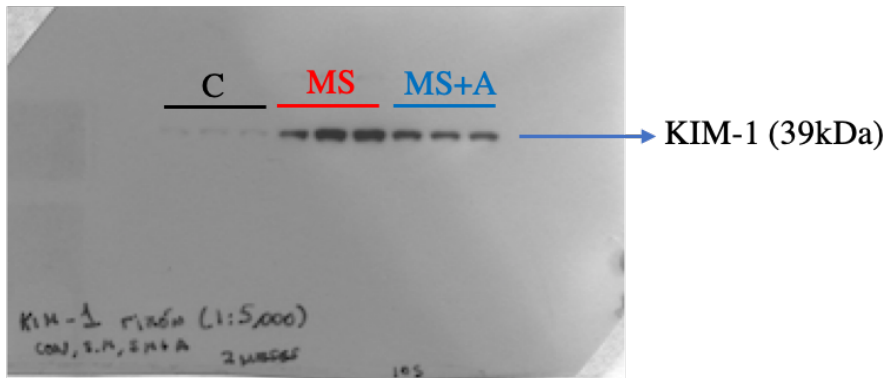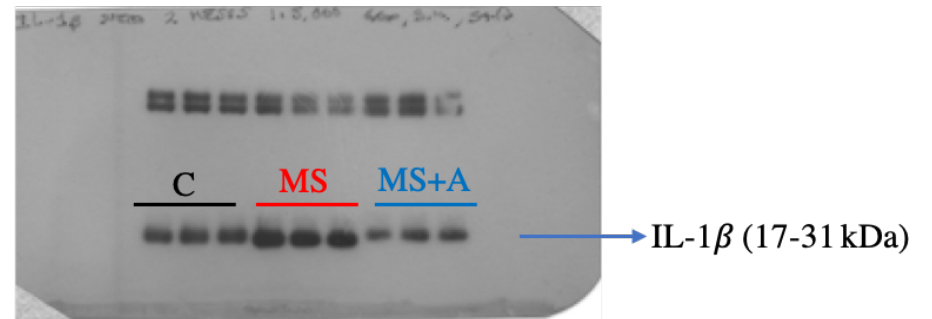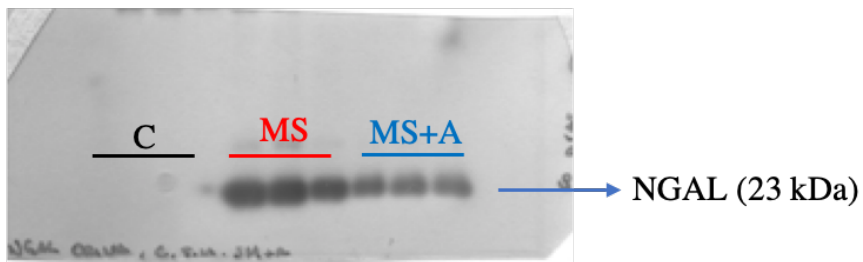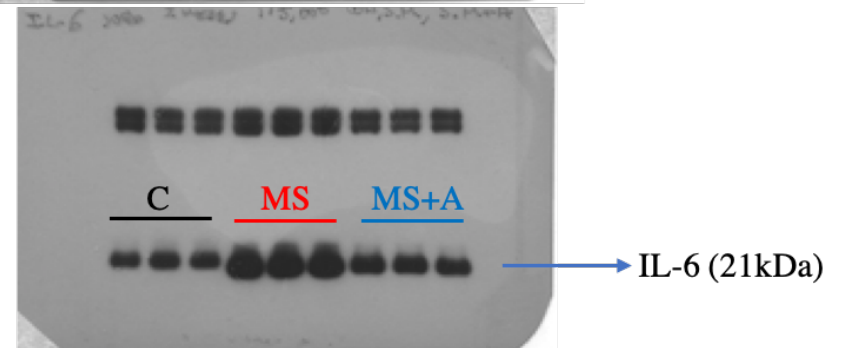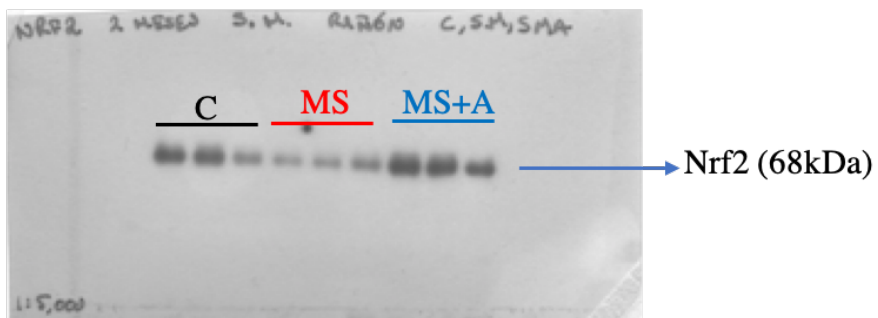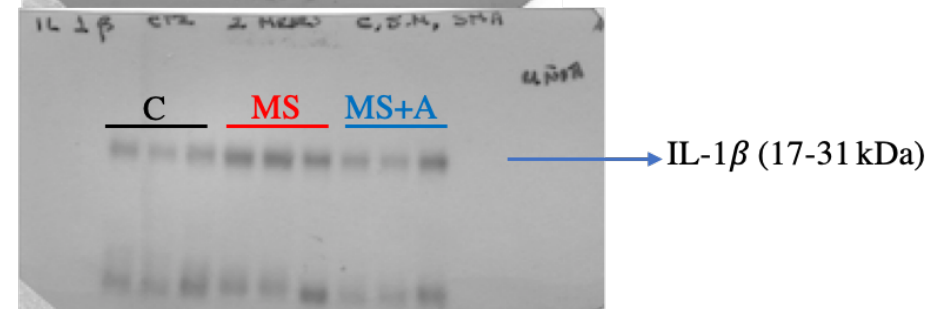

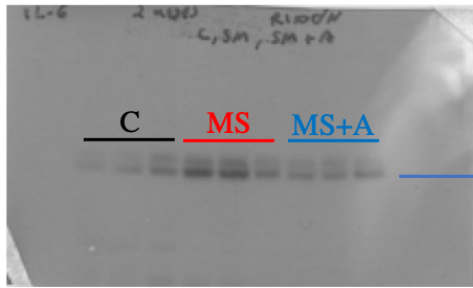

IL-6 (21kDa)

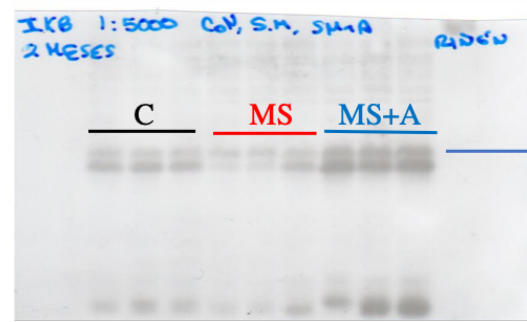

IκB (38kDa)

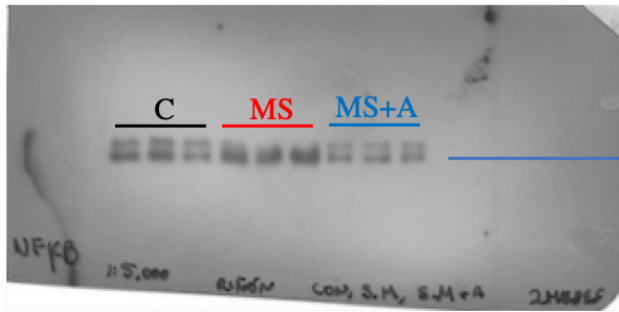

NF-κB (65kDa)

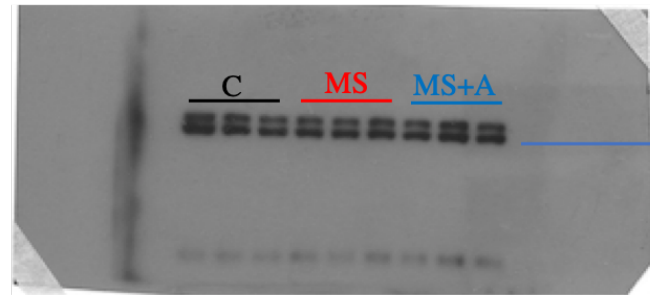

Actin (43kDa)

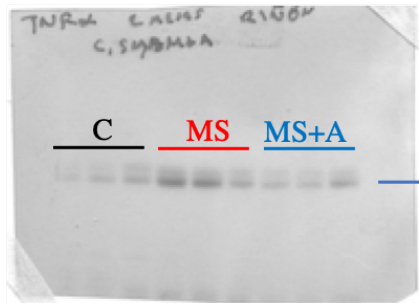

TNF-α (26kDa)

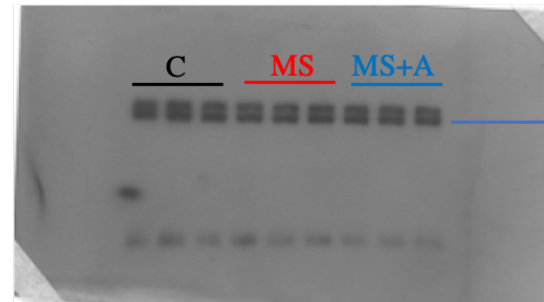

Actin (43kDa)

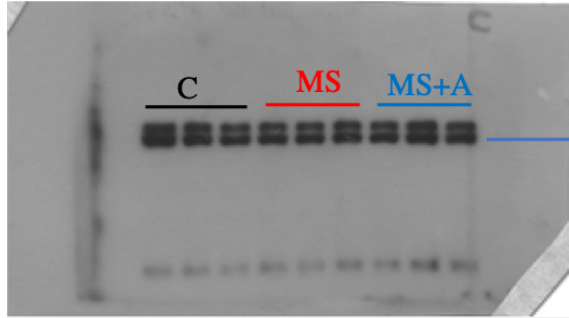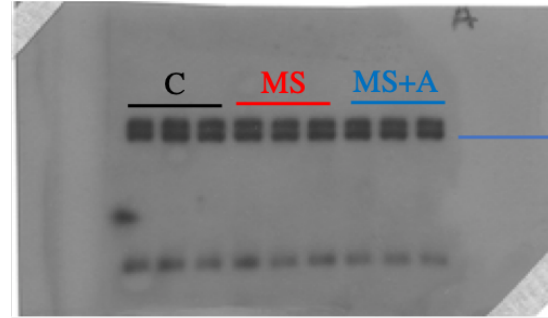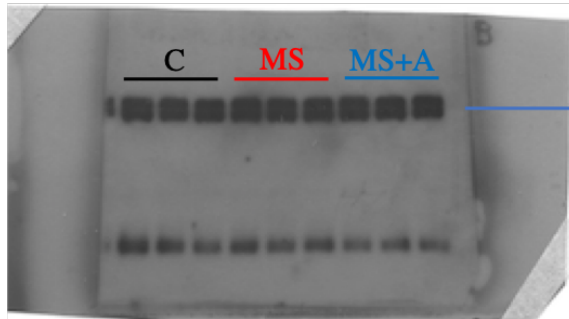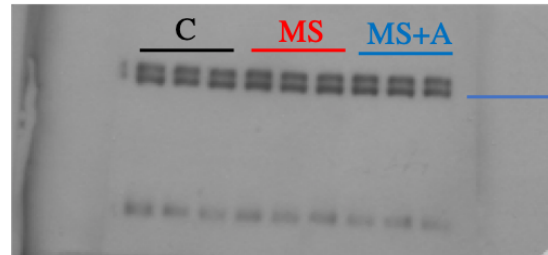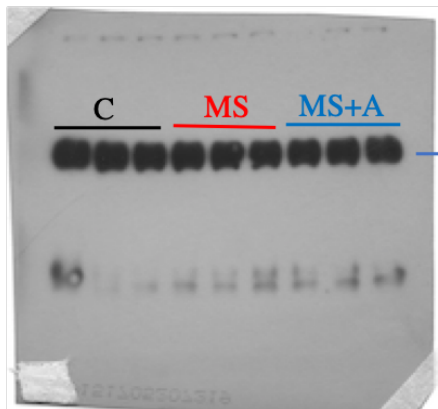

Actin (43kDa)

Actin (43kDa)

Actin (43kDa)

Actin (43kDa)

Actin (43kDa)

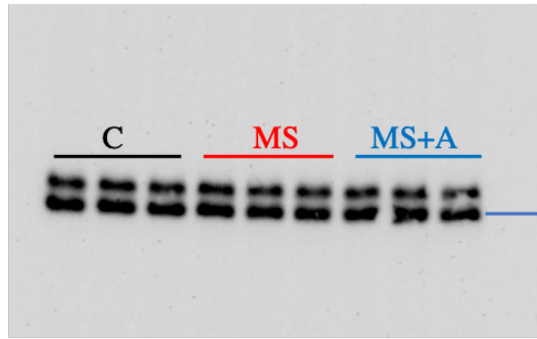

Actin (43kDa)

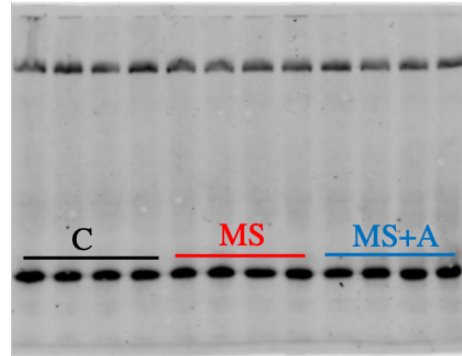

PCNA (45kDa)

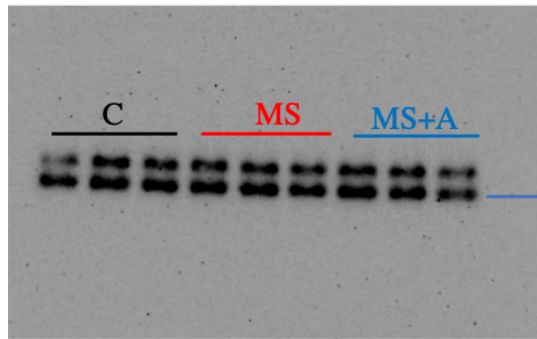

Actin (43kDa)

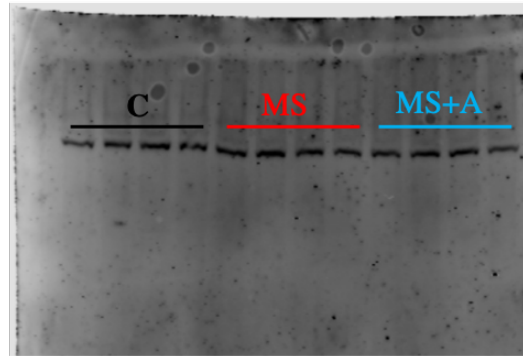

Nuclear NF- $\kappa$ B (65kDa)

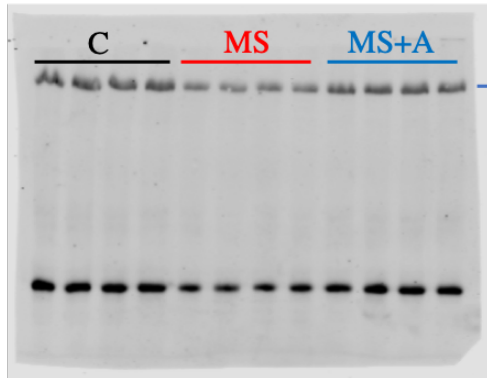

Nuclear Nrf2 (68kDa)

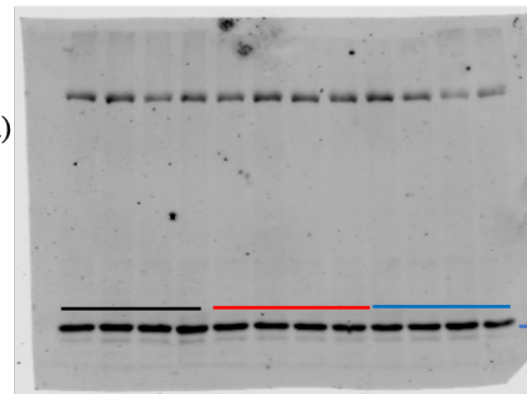

PCNA (45kDa)
