# Supplementary material for: Antioxidant and anti-inflammatory effects of allicin in the kidney of an experimental model of metabolic syndrome
Source: PeerJ journal article supplement (doi:10.7717/peerj.16132), 2023-09-27

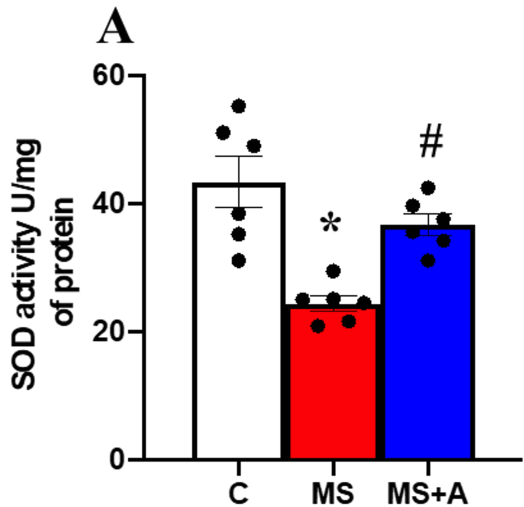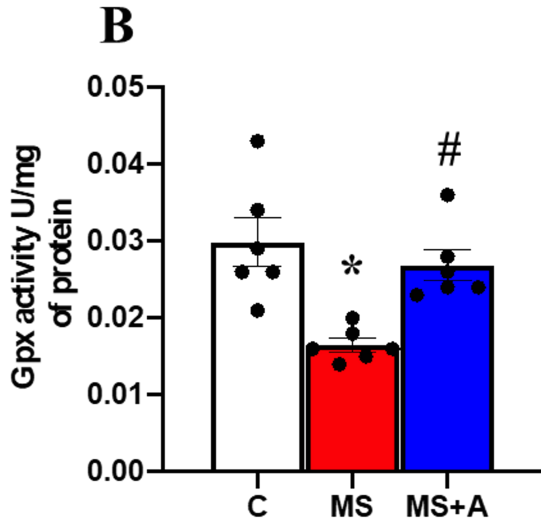

Supplement: Supplementary_Figure_2.pdf [file Supplementary_Figure_2.pdf]
